# Supplementary material for: Electrospun PCL Scaffolds as Drug Carrier for Corneal Wound Dressing Using Layer-by-Layer Coating of Hyaluronic Acid and Heparin
Source: MDPI journal article supplement (doi:10.3390/ijms23052765), 2022-03-02
Supplement: s1 [file s1]

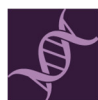

Supplementary Materials

# Electrospun PCL Scaffolds as Drug Carrier for Corneal Wound Dressing Using Layer-by-Layer Coating of Hyaluronic Acid and Heparin

Marcus Himmler <sup>1,2\*</sup>, Dirk W. Schubert <sup>2</sup>, Lars Dähne <sup>3</sup>, Gabriella Egri <sup>3</sup> and Thomas A. Fuchsluger <sup>1,\*</sup>

<sup>1</sup> Department of Ophthalmology, University Medical Center Rostock, Doberaner Straße 140, 18057 Rostock, Germany

<sup>2</sup> Institute of Polymer Materials, Friedrich-Alexander University Erlangen-Nuremberg, Martenstraße 7, 91058 Erlangen, Germany; dirk.schubert@fau.de (D.W.S.)

<sup>3</sup> Surflay Nanotec GmbH, Max-Planck-Str. 3, 12489 Berlin, Germany; l.daehne@surflay.com (L.D.); g.egri@surflay.com (G.E.)

\* Correspondence: marcus.himmler@fau.de (M.H.); thomas.fuchsluger@med.uni-rostock.de (T.A.F.)

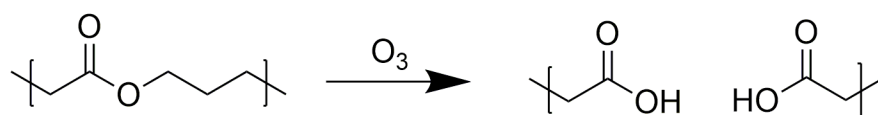

**Figure S1.** Chemical equation for the generation of carboxyl groups on the surface of the PCL nanofibers.

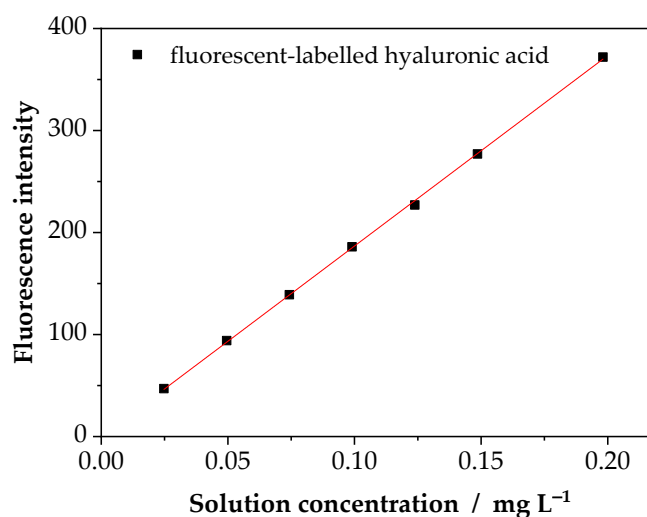

**Figure S2.** Standard curve for the fluorescence intensity versus solution concentration for fluorescent-labelled hyaluronic acid.

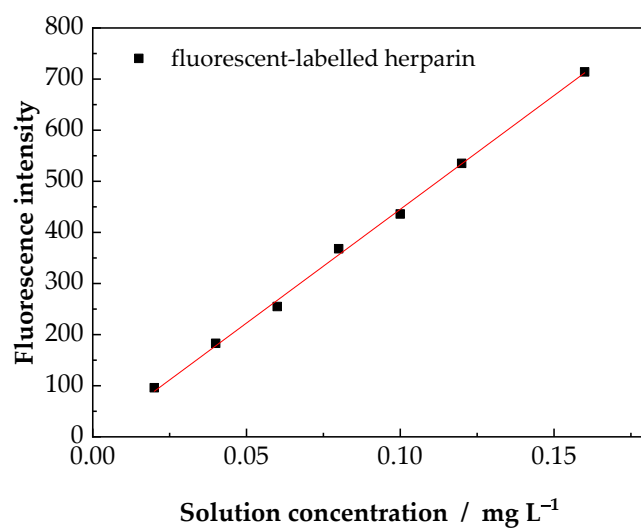

**Figure S3.** Standard curve for the fluorescence intensity versus solution concentration for fluorescent-labelled heparin.

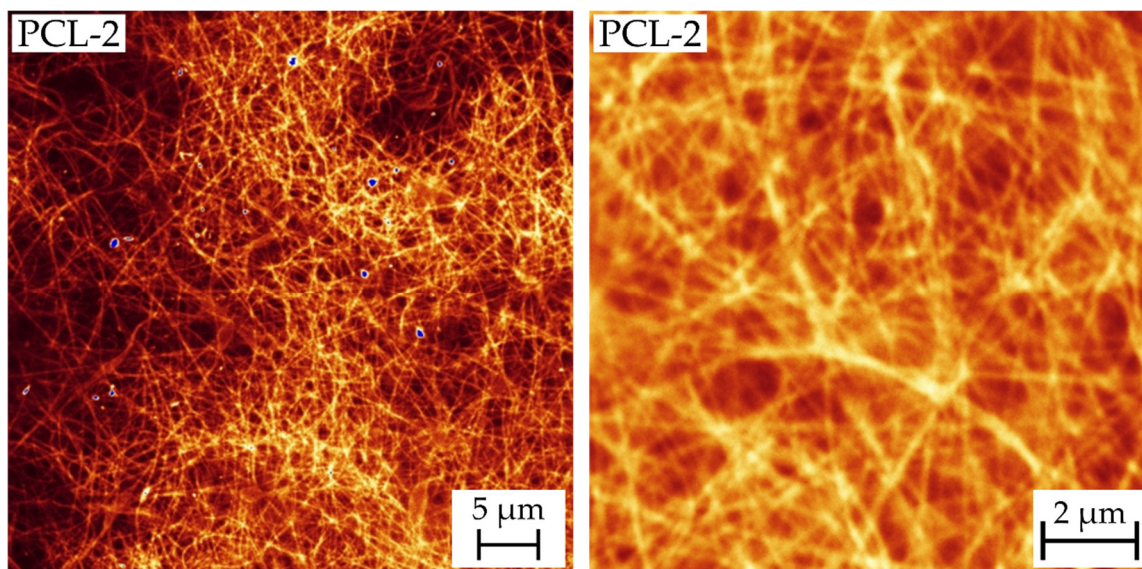

**Figure S4.** Exemplary Confocal Laser Scanning Microscopy (CLSM) image of PCL-2 scaffolds LbL-coated with fluorescently labeled heparin. The nanofibrous structure remains intact after LbL coating and can be visualized by CLSM.
